# Supplementary material for: African Smoke Particles Act as Cloud Condensation Nuclei in the Wintertime Tropical North Atlantic Boundary Layer over Barbados
Source: Copernicus journal article supplement (doi:10.5194/acp-2022-341), 2022-05-24
Supplement: Supplementary file 1 [file acp-2022-341-supplement.pdf]

## **Supporting Information: African Smoke Acts as Cloud Condensation Nuclei in the Wintertime Tropical North Atlantic Boundary Layer over Barbados**

Haley M. Royer<sup>1</sup>, Mira L.-Pöhlker<sup>2,3,4\*</sup>, Ovid Krüger<sup>2</sup>, Edmund Blades<sup>5,6</sup>, Peter Sealy<sup>5</sup>, Nurun Nahar Lata<sup>7</sup>, Zezhen Cheng<sup>7</sup>, Swarup China<sup>7</sup>, Andrew P. Ault<sup>8</sup>, Patricia K. Quinn<sup>9</sup>, Paquita Zuidema<sup>1</sup>, Christopher Pöhlker<sup>2</sup>, Ulrich Pöschl<sup>2</sup>, and Cassandra J. Gaston<sup>1\*</sup>

<sup>1</sup>Department of Atmospheric Sciences, Rosenstiel School of Marine and Atmospheric Science, University of Miami, Miami, FL 33149

<sup>2</sup>Department of Multiphase Chemistry, Max Planck Institute for Chemistry, Mainz, Germany 55128

<sup>3</sup>Leipzig Institute for Meteorology, Leipzig University, Leipzig, Germany

<sup>4</sup>Experimental Aerosol and Cloud Microphysics Department, Leibniz Institute for Tropospheric Research, Leipzig, Germany

<sup>5</sup>Barbados Atmospheric Chemistry Observatory, Ragged Point, Barbados

<sup>6</sup>Queen Elizabeth Hospital Barbados, Bridgetown, Barbados

<sup>7</sup>Environmental Molecular Sciences Laboratory, Pacific Northwest National Laboratory, Richland, WA

<sup>8</sup>Department of Chemistry, University of Michigan, Ann Arbor, MI 48109

<sup>9</sup>Pacific Marine Environmental Laboratory, National Oceanic and Atmospheric Administration, Seattle, WA 98115

\*Corresponding Authors:

Mira L. Pöhlker: Email: [poehlker@tropos.de](mailto:poehlker@tropos.de), Phone: +49 6131 305 7020

Cassandra J. Gaston: Email: [cghoston@rsmas.miami.edu](mailto:cghoston@rsmas.miami.edu), Phone: (305)-421-4979

## I. Fire Map

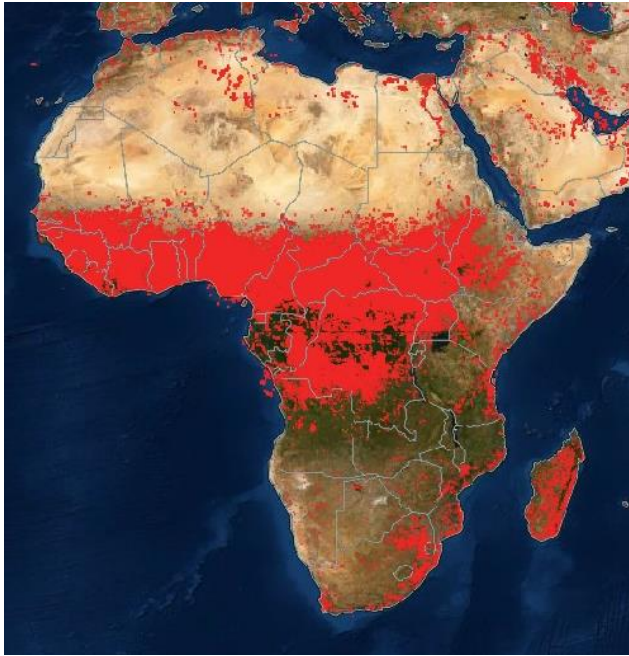

Figure S1 – Active fires (red shading) present between January 29<sup>th</sup> through February 20<sup>th</sup> of 2020 plotted using NASA’s Fire Information for Resource Management System (FIRMS) model. Red shading is produced using NOAA’s Visible Infrared Imaging Radiometer Suite (VIIRS NOAA-20), which shows active fire detections and thermal anomalies.

## II. CO Column Density Measurements during EUREC<sup>4</sup>A/ATOMIC

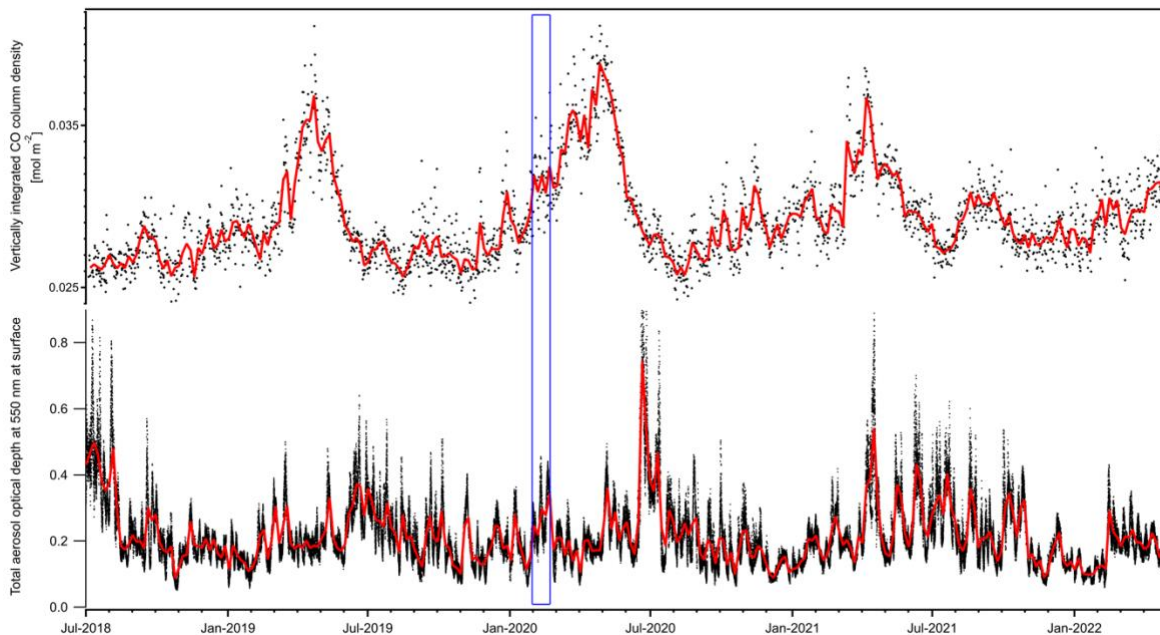

Figure S2 – Carbon monoxide (CO) column density measurements and total aerosol optical depth collected from July 2018 through January 2022 at BACO. Region outlined in blue box indicates time period for EUREC<sup>4</sup>A/ATOMIC campaigns.

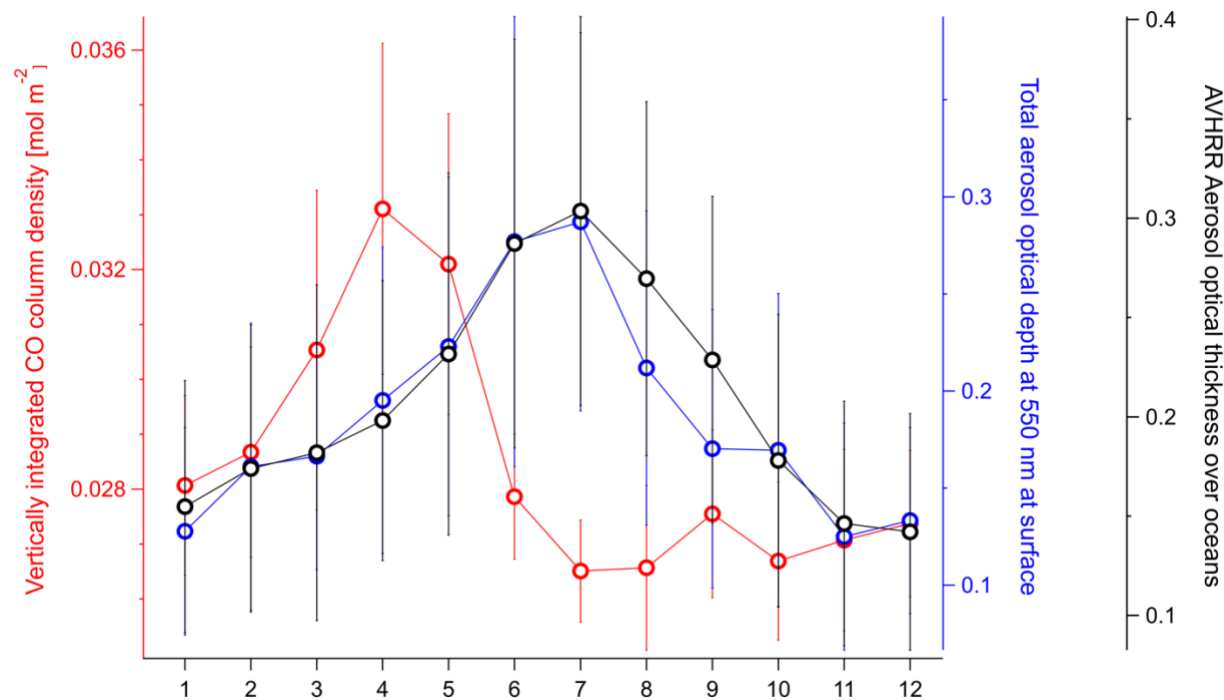

Figure S3 – Monthly averages for carbon monoxide (CO; a proxy for smoke), aerosol optical depth, and aerosol optical thickness collected at Barbados from 2018 – 2022, 2016 – 2022, and 1983 – 2022, respectively.

### III. Size-Resolved Chemistry During EUREC<sup>4</sup>A/ATOMIC

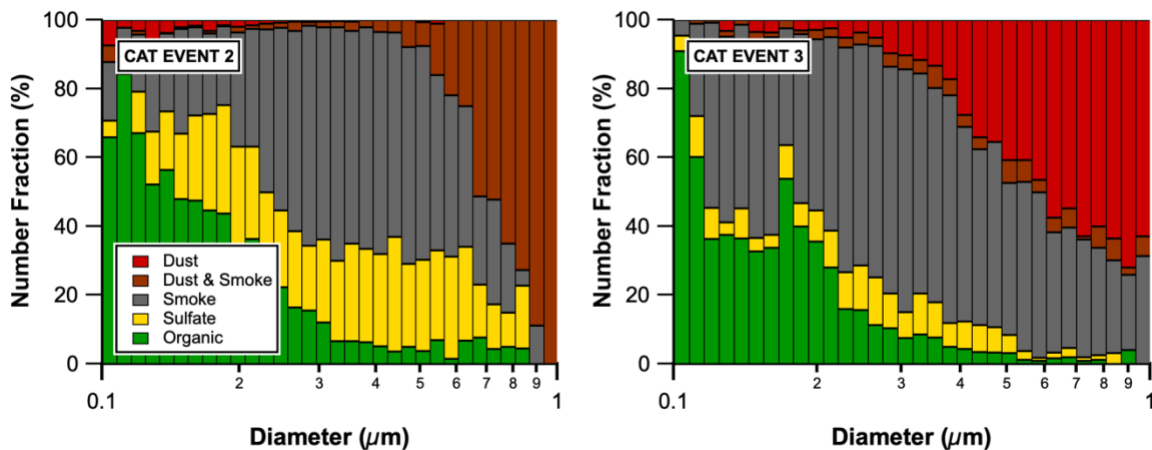

Figure S4 – Number fractions of 6 main submicron particle types plotted as a fraction of aerodynamic diameter (Da). CAT Event 2 and 3 includes size-resolved chemical data from the 2<sup>nd</sup> (2/10/2020 0:00 – 2/12/2020 6:00 GMT) and 3<sup>rd</sup> (2/15/2020 12:00 – 2/20/2020 18:00 GMT) period in which dust and wildfire smoke were observed over Barbados, respectively. Particle counts in bins for CAT Event 2 range from 9 to 476 particles, with an average bin size of 253 particles. Particle counts in bins for CAT Event 3 range from 22 to 792 particles, with an average bin size of 266 particles.
